# Supplementary material
Source: PubMed Central journal article supplement (PMC3926048)
Supplement: 1304988111_pnas.201304988SI.pdf [file 1304988111_pnas.201304988SI.pdf]

# Supporting Information

Natarajan et al. 10.1073/pnas.1304988111

## SI Methods

**RNA Isolation and Microarray.** Total RNA was isolated from B16 cells or whole epidermal cells from punch biopsies after separation of dermis using Dispase II as indicated earlier (1). Whole-genome microarray was carried out using Illumina WG-6 array, and preliminary data normalization and analysis carried out using Beadstudio software using manufacturer's instructions.

**Western Blot Analysis, Immunochemical Method, and Microscopy.** Rabbit  $\alpha$ -hTRP2 antibody [against dopachrome tautomerase (DCT); 1:1,000; Abcam], mouse  $\alpha$ -h-tyrosinase (1:500; Dako), rabbit  $\alpha$ -h-pSTAT1(Y701) (1:1,000; Cell Signaling Technology), mouse  $\alpha$ -h-microphthalmia-associated transcription factor ( $\alpha$ -hMITF; C5 clone; gift from David E. Fisher, Massachusetts General Hospital, Boston), and HRP  $\alpha$ -tubulin (1:2,000; Cell Signaling Technology) were used for Western blot analysis. For tracking melanosomes, melanocytes were grown in LabTek chamber coverglass, fixed, permeabilized, stained with HMB45 followed by secondary Alexa fluor 488, and counterstained with DAPI. The cells were imaged and analyzed with a Zeiss LSM 510 Meta confocal microscope. For transmission EM studies, ultrathin sections (80 nm) were cut on an RMC Ultramicrotome, placed on copper grids, stained with uranyl acetate and lead citrate, and examined on a JEM 2100F transmission electron microscope.

**Constructs and Transfections.** The Dct 3,745-bp promoter (−3,300 to +445 bp from Dct transcription start site) was amplified by PCR and cloned upstream of a luciferase cassette in SacI/XhoI sites of pGL4.23 (Promega). Deletions in the construct were made by site-directed mutagenesis (Stratagene) according to the manufacturer's protocol. Mouse IFN regulatory factor-1 (Irf1)/pcDNA construct was a gift from Nicole Clarke (The University of Nottingham, Nottingham, UK). Transfections were set up at day 3 of low-density cycle with a 6:1 ratio of Cellfectin (Invitrogen) to DNA. Renilla luciferase driven by CMV promoter was cotransfected for normalizations. Posttransfection, low-density media were replaced, and treatments were done; 48 h posttransfection, the cells were lysed with passive lysis buffer (Promega), and luciferase assays were performed according to the manufacturer's protocol (Dual-Luciferase Reporter Assay System; Promega).

**siRNA Transfection.** Human foreskin-derived melanocytes were plated in antibiotic-free M254 media with supplements at a density of  $2 \times 10^5$  cells per well of a six-well plate. Transfection was carried out with Cellfectin reagent (Invitrogen) as per the manufacturer's protocol. The siRNA concentration used was 100 nM for all siRNAs. Briefly, the cells were incubated with siRNA–cellfectin complexes for 6 h followed by trypsinization of the cells and replating in 24-well plates; 4 h after replating, IFN- $\gamma$  was added at a concentration of 100 U/mL in the required wells, and 48 h after IFN- $\gamma$  addition, the cells were harvested for RNA isolation.

**Cell Cycle Analysis by Propidium Iodide Staining.** Primary human cells were treated with 100 U/mL IFN- $\gamma$  for 5 d, and the cells were trypsinized and washed one time in 5–10 mL  $1 \times$  PBS. The cells were resuspended in 1 mL paraformaldehyde fixation solution and incubated on ice for 1 h. Paraformaldehyde was washed using 5 mL  $1 \times$  PBS, and the cell pellet was resuspended in 0.5 mL  $1 \times$  PBS; 4.5 mL ice cold 70% ethanol were added

dropwise over 30 s to 1 min, and the cells were incubated at 4 °C overnight. The cells were then resuspended in 0.5 mL Propidium Iodide (5 mg/mL) staining solution, incubated for 30 min at 37 °C, and analyzed by flow cytometry. The cells were gated based on the DNA content, and the percentages of cells in each stage of the cell cycle were analyzed based on the nuclear content.

**Bead Assay for Detection of Protein Bound to Biotinylated Dct Promoter.** Biotinylated 3.7-kb Dct promoter was immobilized with avidin-agarose beads (Sigma) followed by incubation with IFN- $\gamma$ -treated B16 cells for 4 h at 4 °C on a rocker. The supernatant was discarded, and the DNA-bead-bound proteins were washed three times with buffer (10 mM Hepes, 10 mM KCl, 0.1 M EDTA, 0.1 M EGTA,  $1 \times$  protease inhibitor mixture). The bound proteins were eluted by heating the samples with SDS sample dye at 100 °C for 5 min and loaded onto SDS/PAGE gel followed by Western blot analysis with mouse IRF1 antibody (M-20; Santa Cruz). Nonbiotinylated 3.7-kb Dct promoter was used as control in this assay.

**Quantitation of Pigmentation by Image Analysis.** Images of IFN- $\gamma$ <sup>+/+</sup> and IFN- $\gamma$ <sup>−/−</sup> mice were captured using the Nikon camera under similar lighting conditions. For quantifications, 22 measurements were made for each mouse across each earlobe, and mean gray values were calculated (ImageJ).

## SI Text

### Detection of IFN- $\gamma$ in the Oscillator Model.

- i) Measurement of IFN- $\gamma$  by ELISA in culture supernatants over the course of pigmentation and depigmentation was performed. As low as 0.01 U/mL recombinant mouse IFN- $\gamma$  could be detected. There were no detectable levels of IFN- $\gamma$  in the culture supernatants throughout the cycle.
- ii) Real-time PCR detection of IFN- $\gamma$  transcripts was carried out. IFN- $\gamma$  mRNA could be detected from splenocyte cells that served as positive control. However, IFN- $\gamma$  transcripts could not be detected at all phases of the oscillator.
- iii) Addition of blocking antibody to IFN- $\gamma$  during the course of depigmentation did not alter the depigmentation kinetics or the downstream gene expression changes.

Based on all these observations, we conclude that B16 cells do not actively secrete IFN- $\gamma$ , and the activation of IFN- $\gamma$  signaling is most likely to occur independent of the known cognate ligand. Several studies in the literature have reported such ligand-independent signaling activation (2, 3).

Future studies should examine this pathway in the laboratory. The key finding based on transcriptome signatures that resulted in identification of IFN- $\gamma$  as an important mediator of melanogenesis holds true, and the significance of this finding is supported by experiments in multiple model systems. Other than B16 cells, we have performed these studies in primary melanocytes obtained from different subjects. The density-dependent model does not function in primary melanocytes, because cell–cell contact is important for culturing these cells. Moreover, proliferation and melanogenesis are tightly coupled in primary cells through MITF (4).

1. Natarajan VT, et al. (2010) Transcriptional upregulation of Nrf2-dependent phase II detoxification genes in the involved epidermis of vitiligo vulgaris. *J Invest Dermatol* 130(12):2781–2789.

2. Costa-Pereira AP, et al. (2002) Mutational switch of an IL-6 response to an interferon-gamma-like response. *Proc Natl Acad Sci USA* 99(12):8043–8047.

3. Gao B (2012) Wnt regulation of planar cell polarity (PCP). *Curr Top Dev Biol* 101: 263–295.

4. Nishimura EK, et al. (2010) Key roles for transforming growth factor beta in melanocyte stem cell maintenance. *Cell Stem Cell* 6(2):130–140.

### Setting up B16 *in vivo* model for pigmentation

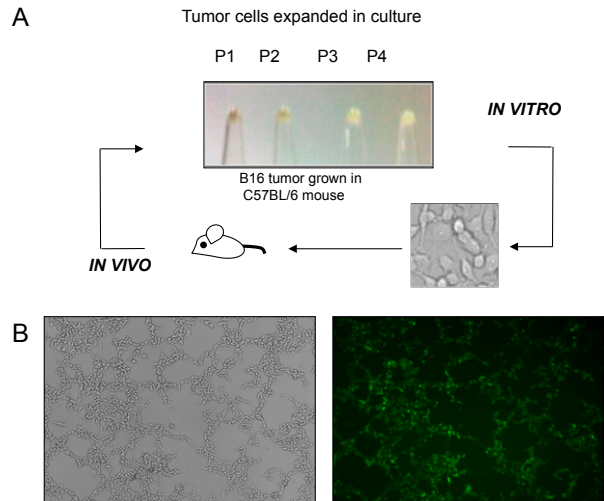

**Fig. S1.** Setting up the B16 *in vivo* model for pigmentation. (A) B16 cells were grown as tumor in C57BL/6 mice. The tumor was dispersed and grown *in vitro* as an adherent culture. Cells were harvested, and pellets from days 4 [passage 1 (P1)], 8 (P2), 12 (P3), and 16 (P4) were imaged. Cells progressively depigmented and were completely devoid of melanin by P4. When these cells were injected back into the animal and grown as tumor, the cells regained pigmentation. (B) B16 melanoma cells obtained from a tumor using a B16 clone stably expressing GFP (TNV2). (Left) Phase contrast. (Right) GFP.

### Setting up B16 *in vitro* model for pigmentation

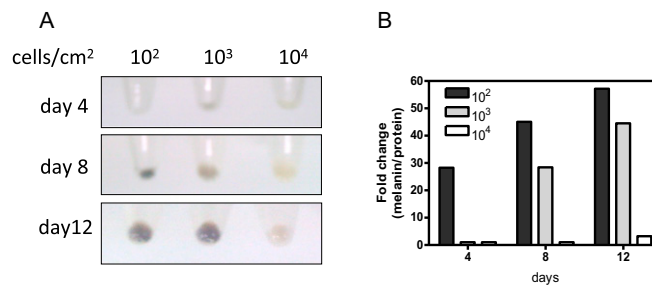

**Fig. S2.** Setting up the B16 *in vitro* model for pigmentation. (A) B16 cells were plated at the indicated cell density for 4, 8, and 12 d. Cells were harvested, and pellets were imaged. (B) Melanin and protein estimations were carried out from the cells, and the ratio of the two is indicated.

### Heat map of pigmentation genes regulated in the pigmentation oscillator

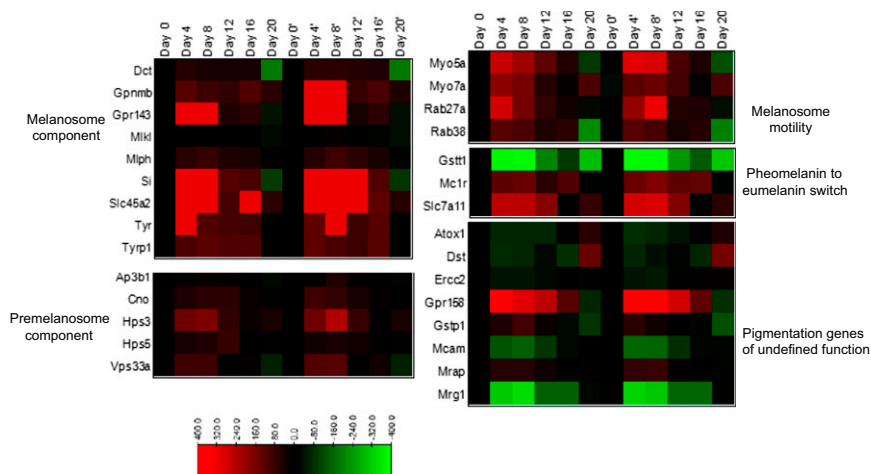

**Fig. S3.** Heat map of pigmentation genes regulated in the pigmentation oscillator. Genes involved in various melanosome-related processes, such as melanosomal component, premelanosomal component, melanosomal motility, and pheomelanin to eumelanin switch, were chosen, and the relative expression level of these genes in the two cycles with respect to day 0 is represented as a heat map.

### Primary human melanocytes are hypopigmented with human IFN- $\gamma$ treatment

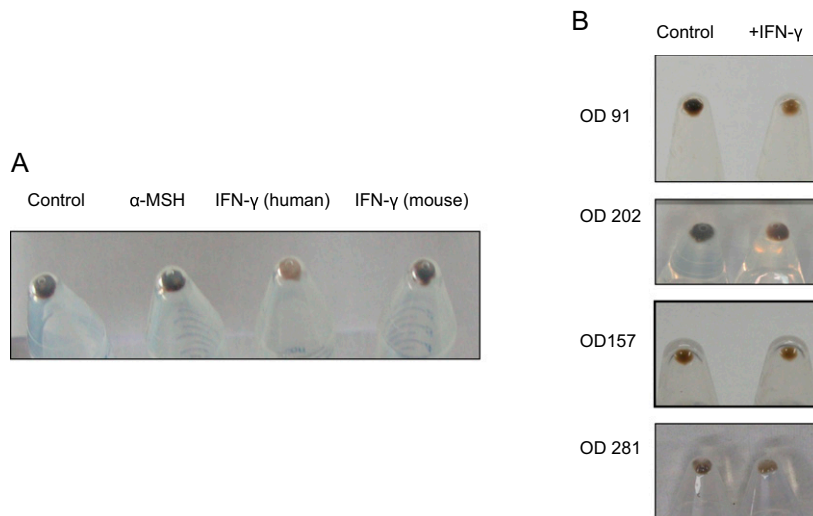

**Fig. S4.** Primary human melanocytes are hypopigmented with human IFN- $\gamma$  treatment. (A) Primary human melanocytes were treated with 600 nM  $\alpha$ -melanocyte stimulating hormone ( $\alpha$ -MSH; known propigmenting agent), human IFN- $\gamma$  (100 U/mL), or mouse IFN- $\gamma$  (100 U/mL) for 7 d, after which time the cell pellets were observed. Only human IFN- $\gamma$  caused visible hypopigmentation. (B) Four independent primary melanocyte cultures obtained from neonatal foreskin show visible hypopigmentation with IFN- $\gamma$  treatment.



## Deciphering pathway for IFN- $\gamma$ mediated DCT regulation

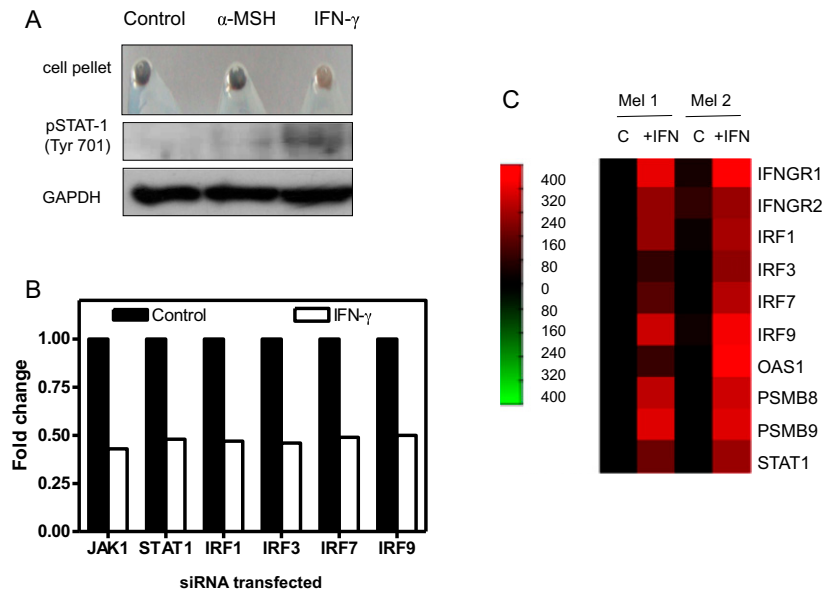

**Fig. S7.** Deciphering the pathway for IFN- $\gamma$ -mediated DCT regulation. (A) Primary human melanocyte cultures were treated with  $\alpha$ -MSH (600 nM) and IFN- $\gamma$  (100 U/mL), and Western blot analysis was performed with  $\alpha$ -pSTAT-1 antibody. GAPDH was used as an equal loading control. (B) Primary human melanocytes were transfected with 100 nM concentration of indicated siRNA, and the mRNA levels for the respective genes were quantitated 48 h posttransfection by using real-time PCR. Fold change in the mRNA levels was calculated with respect to the scrambled siRNA-transfected melanocytes. (C) Heat map of genes regulated by IFN- $\gamma$  in two independent melanocyte cultures (Mel 1 and Mel 2). C, Control.

## Dct promoter constructs used in the study

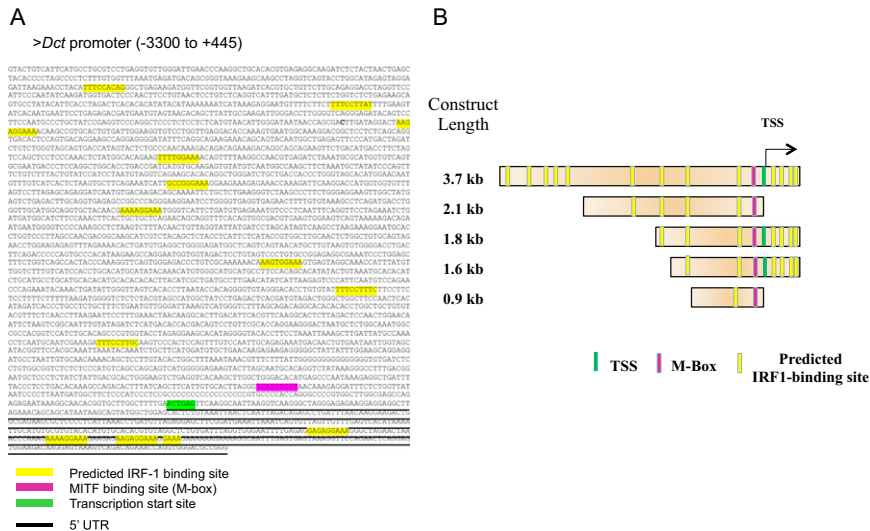

**Fig. S8.** *Dct* promoter constructs used in the study. (A) The full-length 3.7-kb *Dct* promoter with the predicted Irf1 binding sites is highlighted in yellow. (B) *Dct* promoter constructs used in our study. M-Box, MITF binding site; TSS, transcription start site.

## Analysis of non-lesional and lesional skin from Leprosy

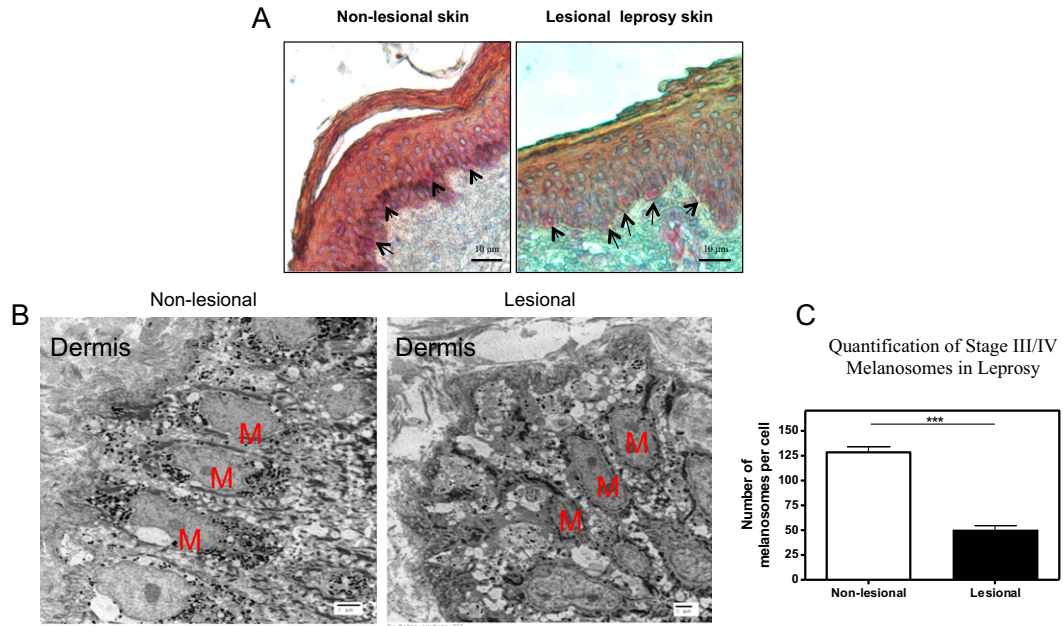

**Fig. S9.** Analysis of nonlesional and lesional skin from leprosy. (A) Immunohistochemical analysis of melanocyte-specific S100 staining in paired nonlesional and lesional leprosy skin. (B) Electron micrographs of nonlesional and lesional skin from a leprosy patient showing presence of melanocytes at the epidermal-dermal junction (M). (C) Quantitation of stage III and IV melanosomes in 10 melanocytes each from the nonlesional and lesional skin of three leprosy patients. Paired *t* test indicated that the means are significantly different with a *P* value less than 0.001. \*\*\**P* value < 0.001.



**Table S1. List of enriched genes from periodogram analysis of pigmentation oscillator**

| Serial no. | Fracmaxamp | Illumina identification | Gene name                                                                 |
|------------|------------|-------------------------|---------------------------------------------------------------------------|
| 1          | 0.949600   | ILMN_195590             |                                                                           |
| 2          | 0.929992   | ILMN_209839             | Solute carrier family 44, member 2                                        |
| 3          | 0.909949   | ILMN_209574             | Cold shock domain containing e1, rna binding                              |
| 4          | 0.883781   | ILMN_212867             |                                                                           |
| 5          | 0.871957   | ILMN_193770             |                                                                           |
| 6          | 0.862152   | ILMN_211146             |                                                                           |
| 7          | 0.851477   | ILMN_251332             | cdna sequence bc006779                                                    |
| 8          | 0.845110   | ILMN_211043             | cbp/p300-interacting transactivator with glu/asp-rich C-terminal domain 1 |
| 9          | 0.832459   | ILMN_226483             | Bone $\gamma$ -carboxyglutamate protein 2                                 |
| 10         | 0.828761   | ILMN_218405             | Expressed sequence ai451617                                               |
| 11         | 0.827349   | ILMN_218425             | Adenylate cyclase 2                                                       |
| 12*        | 0.825594   | ILMN_196778             | IFN-induced transmembrane protein 1                                       |
| 13         | 0.821260   | ILMN_209702             | Glycine receptor, $\beta$ -subunit                                        |
| 14         | 0.821191   | ILMN_186983             |                                                                           |
| 15*        | 0.818360   | ILMN_185224             | Dexh (Asp-Glu-X-His) box polypeptide 58                                   |
| 16*        | 0.818252   | ILMN_185344             | Proteasome (prosome, macropain) subunit, $\beta$ -type 8                  |
| 17         | 0.816414   | ILMN_217565             | Predicted gene 6907; predicted gene 6904; predicted gene 4902             |
| 18         | 0.815229   | ILMN_225841             | Solute carrier family 7, member 11                                        |
| 19         | 0.812510   | ILMN_194594             |                                                                           |
| 20*        | 0.811365   | ILMN_214979             | IFN-induced protein with tetratricopeptide repeats 3                      |
| 21*        | 0.809468   | ILMN_214321             | Dexh (Asp-Glu-X-His) box polypeptide 58                                   |
| 22*        | 0.805007   | ILMN_196777             | IFN-induced transmembrane protein 3                                       |
| 23         | 0.804268   | ILMN_218436             | DNA damage-inducible transcript 4-like                                    |
| 24         | 0.803234   | ILMN_211852             | Purinergic receptor p2x, ligand-gated ion channel 4                       |
| 25         | 0.801671   | ILMN_218343             |                                                                           |
| 26         | 0.797409   | ILMN_193070             |                                                                           |
| 27         | 0.795983   | ILMN_214590             | GST, pi 2; GST, pi 1                                                      |
| 28         | 0.795591   | ILMN_219340             | Glutamate-cysteine ligase, modifier subunit                               |
| 29         | 0.792238   | ILMN_220932             |                                                                           |
| 30*        | 0.790793   | ILMN_196750             | Histocompatibility 2, t-region locus 23                                   |
| 31*        | 0.785869   | ILMN_210061             | Phospholipase c, $\gamma$ 2                                               |
| 32*        | 0.783091   | ILMN_253583             | Chemokine (C-X-C motif) ligand 10 (IFN- $\gamma$ -induced protein CRG-2)  |
| 33         | 0.782865   | ILMN_213914             | Angiopoietin 2                                                            |
| 34         | 0.782641   | ILMN_220401             |                                                                           |
| 35         | 0.780631   | ILMN_201755             |                                                                           |
| 36         | 0.780488   | ILMN_196409             |                                                                           |
| 37*        | 0.779627   | ILMN_257425             | Dexh (Asp-Glu-X-His) box polypeptide 58                                   |
| 38         | 0.775060   | ILMN_215955             | G2 s phase-expressed protein 1                                            |
| 39         | 0.773665   | ILMN_256110             | Adenosine deaminase, rna-specific                                         |
| 40*        | 0.769889   | ILMN_209202             | IFN- $\gamma$ -induced GTPase                                             |
| 41*        | 0.769203   | ILMN_186258             | Ubiquitin-specific peptidase 18                                           |
| 42         | 0.769026   | ILMN_187187             | Tripartite motif-containing 56                                            |
| 43         | 0.768357   | ILMN_222570             | Riken cdna 2310016c08 gene                                                |
| 44*        | 0.767755   | ILMN_216138             | Myxovirus (influenza virus) resistance 2                                  |
| 45*        | 0.765728   | ILMN_196752             | Histocompatibility 2, q-region locus 5                                    |
| 46         | 0.765117   | ILMN_238157             | Death inducer-obliterator 1                                               |
| 47         | 0.765001   | ILMN_216376             | Integral membrane protein 2b                                              |
| 48*        | 0.763112   | ILMN_223999             | Chemokine (c-x-c motif) ligand 10                                         |
| 49         | 0.762391   | ILMN_211080             | Thymocyte nuclear protein 1                                               |
| 50         | 0.762041   | ILMN_213913             | Atp synthase, h+ transporting, mitochondrial f0 complex, subunit s        |
| 51*        | 0.760474   | ILMN_237558             | Ww domain containing e3 ubiquitin protein ligase 1                        |
| 52         | 0.758913   | ILMN_215880             | Proline-rich polypeptide 6                                                |
| 53         | 0.755828   | ILMN_213057             | MAPK kinase kinase 1                                                      |
| 54*        | 0.755805   | ILMN_218776             | Guanylate binding protein 6                                               |
| 55*        | 0.755243   | ILMN_215351             | ATPase, h+ transporting, lysosomal v0 subunit a1                          |
| 56*        | 0.754930   | ILMN_212179             | 2'-5' oligoadenylate synthetase 1g                                        |
| 57         | 0.754898   | ILMN_237580             | High-mobility group box transcription factor 1                            |
| 58         | 0.754254   | ILMN_223985             |                                                                           |
| 59*        | 0.753283   | ILMN_211229             | IRF7                                                                      |
| 60*        | 0.752297   | ILMN_219577             | Sequestosome 1                                                            |
| 61         | 0.751231   | ILMN_223944             | Family with sequence similarity 70, member A                              |
| 62         | 0.750676   | ILMN_202718             | Similar to unknown (protein for IMAGE: 4910858); predicted gene 4076      |
| 63*        | 0.748676   | ILMN_212338             | IFN-induced protein 35                                                    |

Table S1. Cont.

| Serial no. | Fracmaxamp | Illumina identification | Gene name                                                                           |
|------------|------------|-------------------------|-------------------------------------------------------------------------------------|
| 64         | 0.747622   | ILMN_213017             | Caveolin, caveolae protein 1                                                        |
| 65         | 0.746548   | ILMN_215799             |                                                                                     |
| 66*        | 0.746115   | ILMN_217537             | Inhibitor of DNA binding 2                                                          |
| 67         | 0.745492   | ILMN_214397             | Coiled-coil domain containing 84                                                    |
| 68*        | 0.743316   | ILMN_214605             | Radical s-adenosyl methionine domain containing 2                                   |
| 69         | 0.742414   | ILMN_212540             | Lysophosphatidylcholine acyltransferase 2                                           |
| 70         | 0.742413   | ILMN_212110             | Apolipoprotein L 9b; apolipoprotein L 9a                                            |
| 71         | 0.741198   | ILMN_230539             | Transient receptor potential cation channel, subfamily m, member 1                  |
| 72         | 0.740058   | ILMN_220818             | Phosphoglycolate phosphatase                                                        |
| 73         | 0.739570   | ILMN_188510             |                                                                                     |
| 74         | 0.737070   | ILMN_217201             | Ectodermal-neural cortex 1                                                          |
| 75         | 0.736869   | ILMN_222986             | Synaptophysin-like protein                                                          |
| 76         | 0.735042   | ILMN_210108             | Heat-responsive protein 12                                                          |
| 77         | 0.734609   | ILMN_217932             | Acyl-coa dehydrogenase, long-chain                                                  |
| 78*        | 0.734464   | ILMN_219674             | Lipocalin 2                                                                         |
| 79*        | 0.733974   | ILMN_223721             | Guanine nucleotide binding protein (g protein), $\gamma$ 7 subunit                  |
| 80         | 0.733795   | ILMN_189853             | Similar to tripartite motif protein TRIM34- $\alpha$ ; tripartite motif-containing  |
| 81         | 0.732014   | ILMN_213064             |                                                                                     |
| 82         | 0.731980   | ILMN_213156             | Rap guanine nucleotide exchange factor (gef) 4                                      |
| 83         | 0.731704   | ILMN_203309             | Riken cdna 1200016e24 gene                                                          |
| 84         | 0.729582   | ILMN_209247             | Eukaryotic translation initiation factor 4e member 2                                |
| 85*        | 0.729061   | ILMN_209850             | IRF1                                                                                |
| 86         | 0.728772   | ILMN_192852             | Ankyrin repeat and FYVE domain containing 1                                         |
| 87         | 0.728001   | ILMN_218499             |                                                                                     |
| 88         | 0.725636   | ILMN_220043             | Proteolipid protein (myelin) 1                                                      |
| 89         | 0.725446   | ILMN_241583             | Aldehyde dehydrogenase 4 family, member a1                                          |
| 90         | 0.725223   | ILMN_221196             |                                                                                     |
| 91         | 0.724528   | ILMN_203650             | Unc-5 homolog c ( <i>Caenorhabditis elegans</i> )                                   |
| 92         | 0.723849   | ILMN_191462             |                                                                                     |
| 93         | 0.721978   | ILMN_210363             |                                                                                     |
| 94         | 0.721533   | ILMN_185693             |                                                                                     |
| 95         | 0.720974   | ILMN_234373             | Riken cdna 1810048j11 gene                                                          |
| 96*        | 0.720583   | ILMN_209781             | 2'-5' oligoadenylate synthetase-like 2                                              |
| 97         | 0.720318   | ILMN_221506             | Bernardinelli-seip congenital lipodystrophy 2 homolog (human)                       |
| 98         | 0.719436   | ILMN_220771             | Testis-expressed gene 2                                                             |
| 99         | 0.719395   | ILMN_196495             |                                                                                     |
| 100        | 0.718500   | ILMN_186712             | Unc-84 homolog a ( <i>C. elegans</i> )                                              |
| 101*       | 0.718117   | ILMN_193206             | Ubiquitin-conjugating enzyme e2n                                                    |
| 102        | 0.717922   | ILMN_211574             | Importin 13                                                                         |
| 103        | 0.717859   | ILMN_202582             | Stt3, subunit of the oligosaccharyltransferase complex                              |
| 104        | 0.717748   | ILMN_224259             | Formin homology 2 domain containing 1                                               |
| 105        | 0.715915   | ILMN_194391             | Transformation-related protein 53-inducible nuclear protein 1                       |
| 106        | 0.715812   | ILMN_188004             |                                                                                     |
| 107*       | 0.715777   | ILMN_192153             | TNF receptor-associated factor 2                                                    |
| 108        | 0.715619   | ILMN_192099             |                                                                                     |
| 109        | 0.713326   | ILMN_216296             | Hemicentin 2                                                                        |
| 110        | 0.713066   | ILMN_190871             | Hexokinase 1                                                                        |
| 111        | 0.713043   | ILMN_220667             | Stt3, subunit of the oligosaccharyltransferase complex                              |
| 112        | 0.712526   | ILMN_210607             | Guanine nucleotide binding protein (g protein), $\beta$ -polypeptide 1-like         |
| 113*       | 0.711394   | ILMN_210436             | Guanylate nucleotide binding protein 2                                              |
| 114        | 0.710531   | ILMN_208910             | Family with sequence similarity 122, member B                                       |
| 115        | 0.709855   | ILMN_215138             | Budding uninhibited by benzimidazoles 3 homolog ( <i>Saccharomyces cerevisiae</i> ) |
| 116        | 0.709693   | ILMN_197368             |                                                                                     |
| 117        | 0.709485   | ILMN_220503             | Plasminogen activator, tissue                                                       |
| 118        | 0.709362   | ILMN_215301             | Signal transducer and activator of transcription 2                                  |
| 119        | 0.709157   | ILMN_194133             | Tetratricopeptide repeat domain 7b                                                  |
| 120        | 0.708279   | ILMN_210695             | Cdp-diaclyglycerol-inositol 3-phosphatidyltransferase                               |
| 121        | 0.707780   | ILMN_211037             | Oligophrenin 1                                                                      |
| 122        | 0.705834   | ILMN_202025             | Poly (ADP ribose) polymerase family, member 14                                      |
| 123        | 0.705386   | ILMN_212511             | Eukaryotic translation elongation factor 1 $\beta$ 2                                |
| 124        | 0.704807   | ILMN_190833             | Inositol 1,4,5-triphosphate receptor interacting protein-like 1                     |
| 125        | 0.704760   | ILMN_220963             | Formin-like 2                                                                       |



**Table S1. Cont.**

| Serial no. | Fracmaxamp | Illumina identification | Gene name                                                        |
|------------|------------|-------------------------|------------------------------------------------------------------|
| 126        | 0.704545   | ILMN_229747             | Basic leucine zipper transcription factor, ATF-like 3            |
| 127*       | 0.704483   | ILMN_185655             | Dual-specificity tyrosine-(Y)-phosphorylation-regulated kinase 3 |
| 128        | 0.704205   | ILMN_184842             | Mitochondrial ribosomal protein s10                              |
| 129        | 0.703600   | ILMN_187349             |                                                                  |
| 130        | 0.702238   | ILMN_233734             | Carbonic anhydrase 12                                            |
| 131        | 0.702040   | ILMN_191331             |                                                                  |
| 132*       | 0.701812   | ILMN_221143             | Hla-b-associated transcript 5                                    |
| 133        | 0.701722   | ILMN_210247             | $\rho$ -GTPase activating protein 12                             |
| 134        | 0.701543   | ILMN_193808             |                                                                  |
| 135        | 0.701461   | ILMN_213966             | Solute carrier family 44, member 3                               |
| 136        | 0.701399   | ILMN_217326             | Coatamer protein complex subunit- $\alpha$                       |
| 137        | 0.701355   | ILMN_189204             |                                                                  |
| 138        | 0.701050   | ILMN_224086             | Rwd domain containing 2                                          |
| 139        | 0.700743   | ILMN_211093             | Nuclear factor of activated T cells 5                            |
| 140        | 0.700695   | ILMN_239612             | Poly (ADP ribose) polymerase family, member 14                   |
| 141        | 0.700107   | ILMN_224541             | Synaptotagmin-like 2                                             |

\*Genes regulated by IFN- $\gamma$ .
